# Supplementary material for: A high-energy efficiency static membrane-free zinc–bromine battery enabled by a high concentration hybrid electrolyte
Source: Royal Society of Chemistry journal article supplement (doi:10.1039/d1se01749g), 2022-01-01
Supplement: d1se01749g1.pdf [file d1se01749g1.pdf]

## Electronic Supplementary Information

### Supporting Information

for

#### **A High-Energy Efficiency Membraneless Flowless Zinc Bromine Battery**

#### **Enabled By High Concentration Hybrid Electrolyte**

*Siyang Liu<sup>a,b</sup>, Jing Wu<sup>a,b</sup>, Jiaqi Huang<sup>a,b</sup>, Xiaowei Chi<sup>a\*</sup>, Jianhua Yang<sup>a,b</sup>, Yu Liu<sup>a\*</sup>*

Siyang Liu, Jing Wu, Jiaqi Huang, Prof. Xiaowei Chi, Prof. Jianhua Yang, Prof. Yu

Liu

<sup>a</sup>Shanghai Institute of Ceramics, Chinese Academy of Sciences

Shanghai 200050, China

Email: xwchi@mail.sic.ac.cn

Email: yuliu@mail.sic.ac.cn

<sup>b</sup>University of Chinese Academy of Sciences

Beijing 100049, China

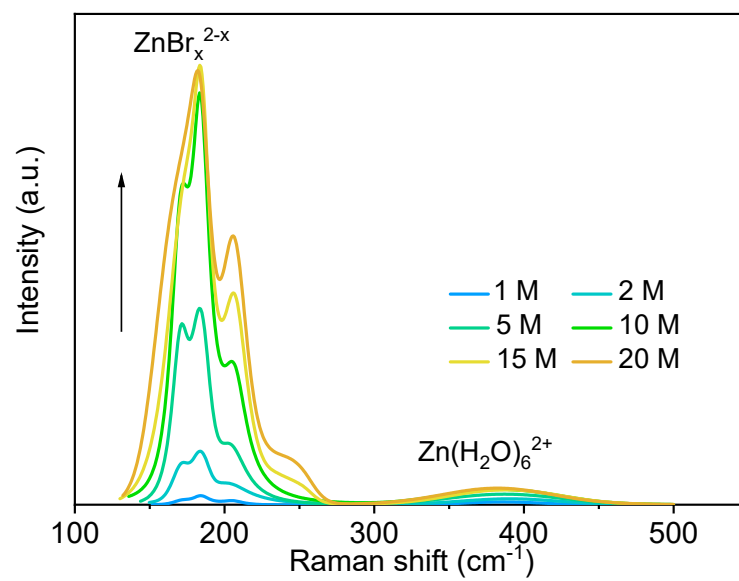

**Figure S1.** Raman spectra of ZnBr<sub>2</sub> solution of different concentrations.

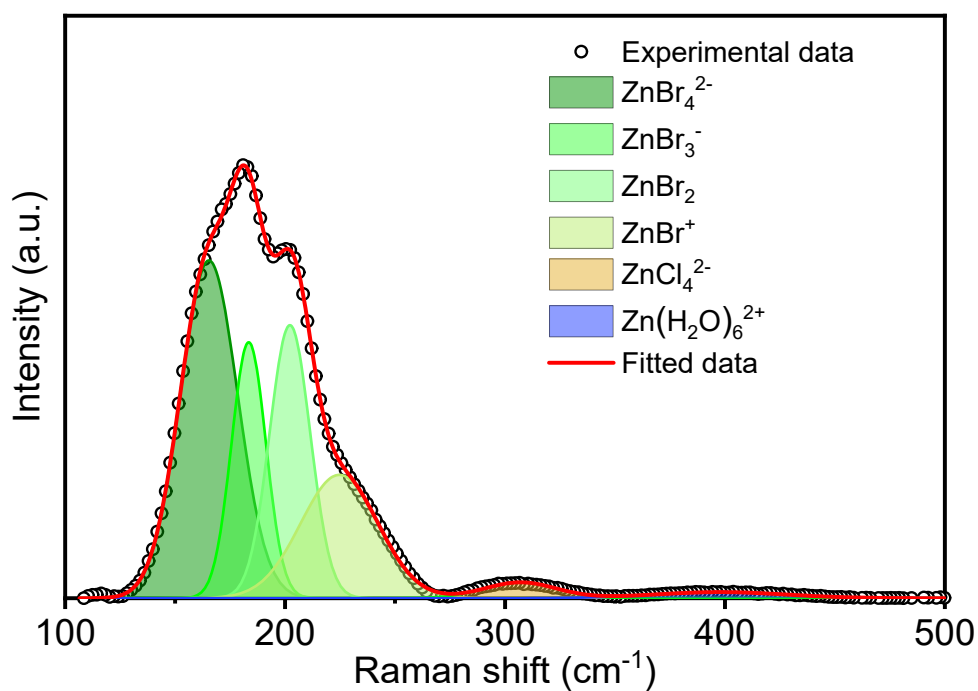

**Figure S2.** The Raman spectrum of 20 M ZnBr<sub>2</sub> + 10 M LiCl electrolyte.

The impact of the LiCl to the solution structure was investigated by Raman spectrum.

The full spectrum from 100 cm<sup>-1</sup> to 600 cm<sup>-1</sup> can be fitted to six peaks, which represents ZnBr<sub>4</sub><sup>2-</sup>, ZnBr<sub>3</sub><sup>-</sup>, ZnBr<sub>2</sub>, ZnBr<sup>+</sup>, ZnCl<sub>x</sub><sup>2-x</sup> and Zn(H<sub>2</sub>O)<sub>6</sub><sup>2+</sup>, respectively. New complex species of ZnCl<sub>x</sub><sup>2-x</sup> formed and the relative quantity of Zn(H<sub>2</sub>O)<sub>6</sub><sup>2+</sup> complex species reduced after the addition of 10 M LiCl.

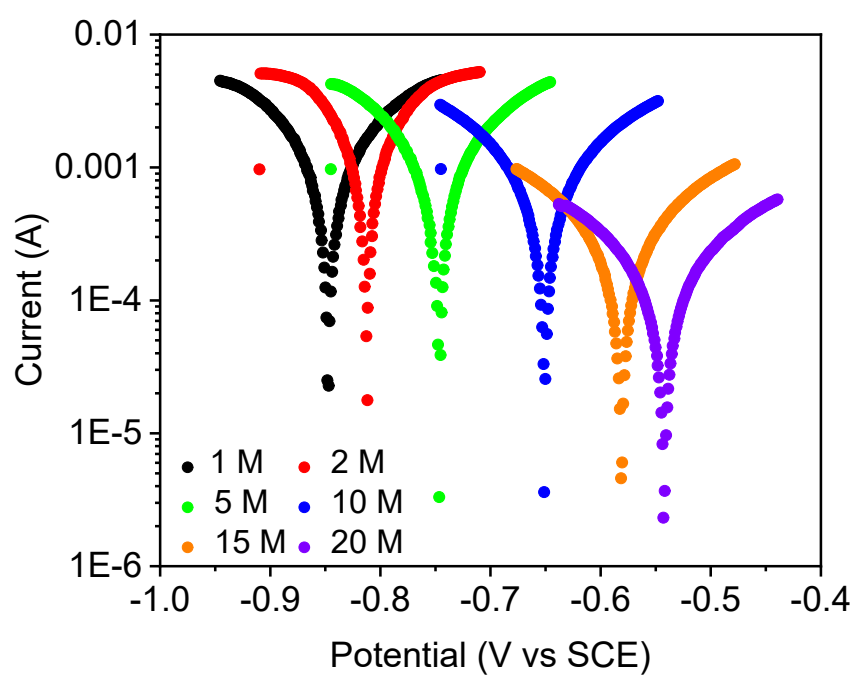

**Figure S3.** Linear polarization curve of zinc anode in different concentration of ZnBr<sub>2</sub> solution.

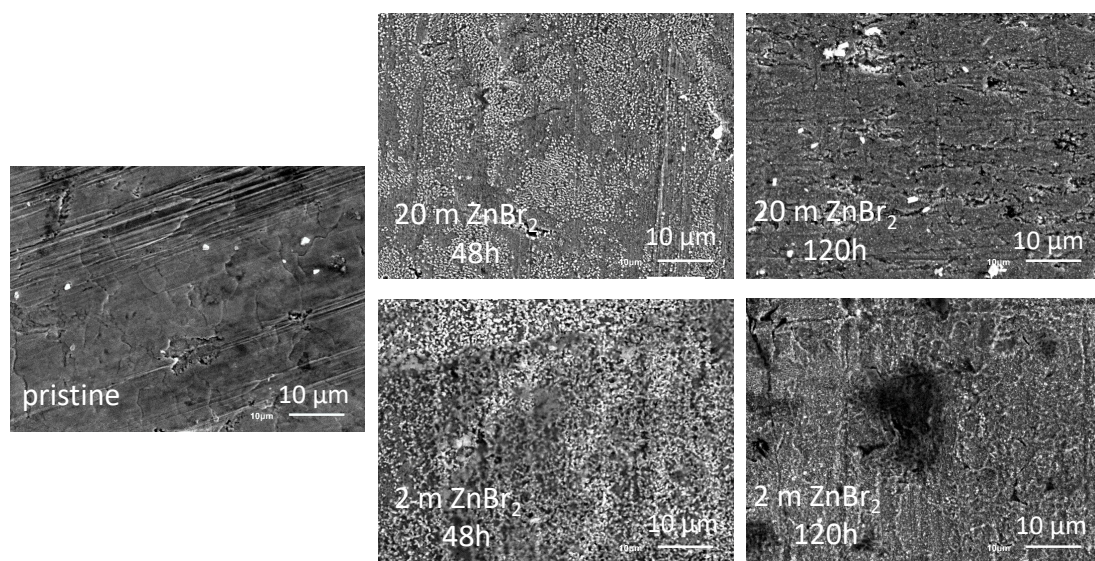

**Figure S4.** SEM image of the surface of zinc foil immersed in 2 M and 20 M ZnBr<sub>2</sub> solutions for different hours.

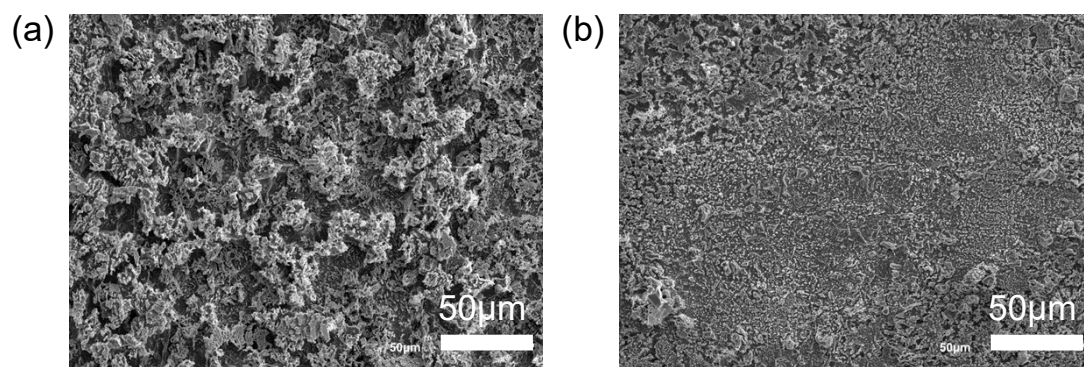

**Figure S5.** The SEM images of the surface of zinc foil charge/discharged at  $1 \text{ mA}\cdot\text{cm}^{-2}$  and  $0.5 \text{ mAh}\cdot\text{cm}^{-2}$  in (a) 20 M  $\text{ZnBr}_2$  and (b) 20 M  $\text{ZnBr}_2 + 10 \text{ M LiCl}$  for 100 cycles.

20 M  $\text{ZnBr}_2$   
+ 10 M  $\text{LiCl}$

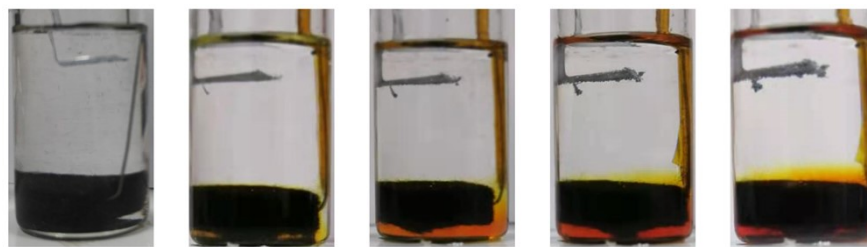

2M  $\text{ZnBr}_2$

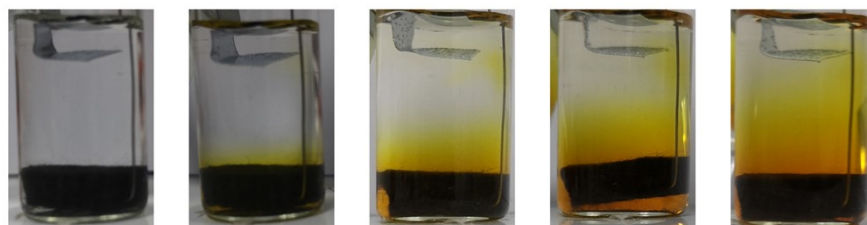

pristine

20min

40min

60min

90min

**Figure S6.** Photograph of different electrolyte during charging process under a current of 5 mA.

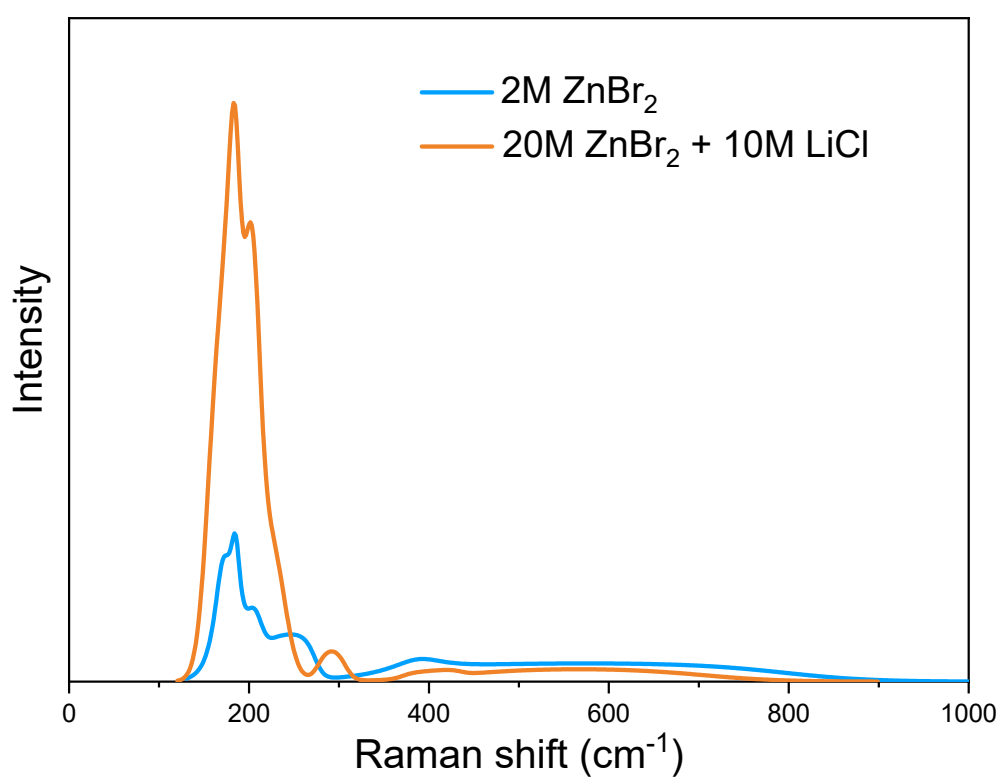

**Figure S7.** Raman spectra of different electrolyte after charging process of a capacity of 10 mAh.

### Calculation of concentration of HBrO ([HBrO])

In an aqueous solution, the electrogenerated bromine species include  $\text{Br}_2$ ,  $\text{Br}_3^-$ ,  $\text{HBrO}$  and  $\text{BrO}^-$ , which mutually transform according to the following equations:

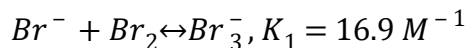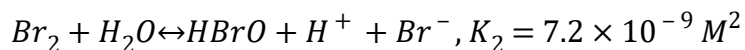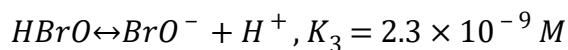

By rearranging these equations to solve the  $[\text{HBrO}]$ , the mole fraction of  $\text{HBrO}$  can be expressed as follow<sup>1</sup>:

$$\alpha_{\text{HBrO}} = \frac{K_2[\text{H}^+]}{[\text{Br}^-][\text{H}^+]^2 + K_1[\text{Br}^-]^2[\text{H}^+]^2 + K_2[\text{H}^+] + K_2K_3}$$

According to the calculation, in an acidic solution, the fraction of  $\text{HBrO}$  decreases with increasing  $[\text{H}^+]$  and  $[\text{Br}^-]$ , as is shown in Fig. S8. Therefore, due to the ultrahigh concentration of  $[\text{Br}^-]$  and low pH (namely the high concentration of  $[\text{H}^+]$ ) of the concentrated electrolyte, the content of  $\text{HBrO}$  in 20 M  $\text{ZnBr}_2$  + 10 M  $\text{LiCl}$  was considerably much lower than that of the common  $\text{Br}_2$ -containing electrolytes.

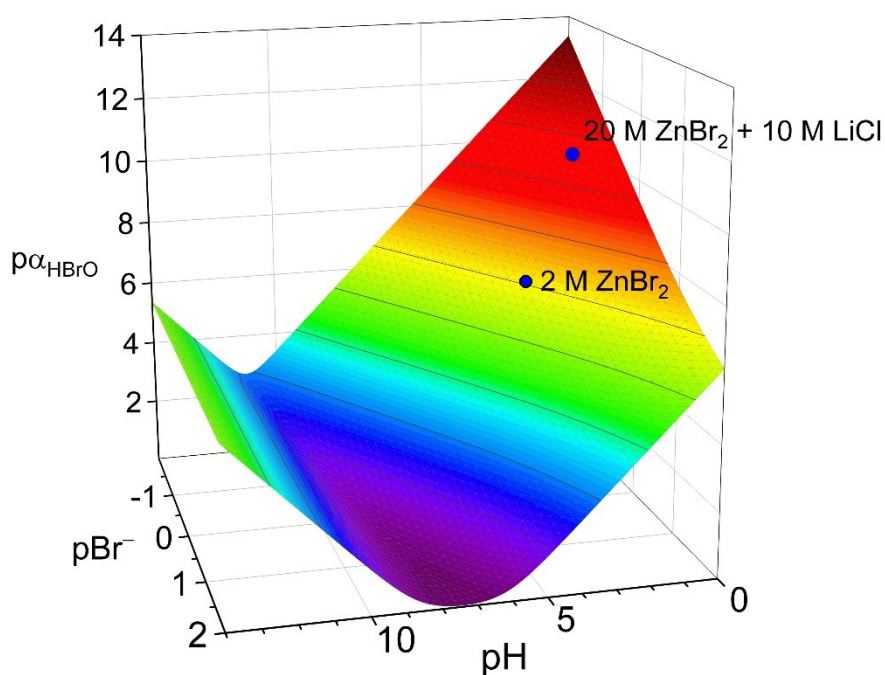

**Figure S8.** The relationship of the fraction of HBrO as a function of the concentration of Br<sup>-</sup> and the pH value of solution.

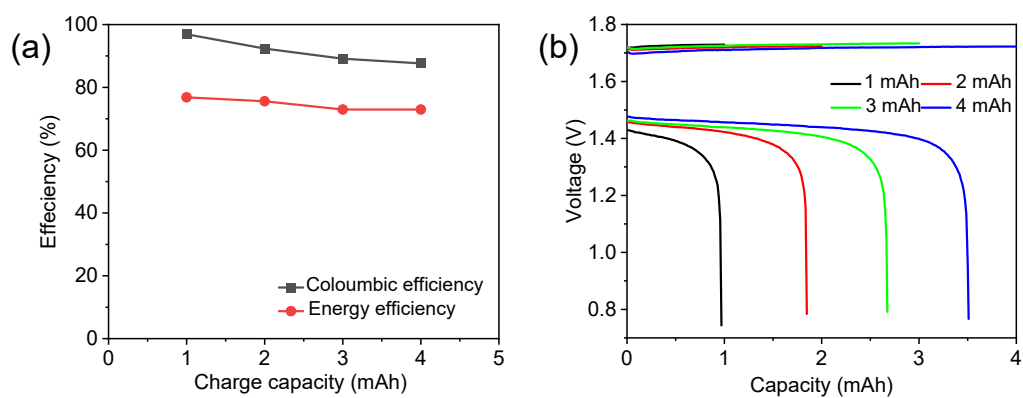

**Figure S9.** (a) Coloumbic efficiency under different charge capacity; (b) Capacity-voltage curve in the process of charge and discharge under different capacity. The utilization rates of the electrolyte is c.a. 1.8%.

**Table S1.** Currently reported static membrane-free zinc bromine battery systems and the system developed in this work.

| System                                     | CE         | EE         | Cycle number | Cycle life (h) |
|--------------------------------------------|------------|------------|--------------|----------------|
| Density separation <sup>2</sup>            | 90%        | 60%        | 1000         | 4000           |
| Protonated N-doped electrodes <sup>3</sup> | 90%        | 80%        | 1000         | 2000           |
| Interfacial battery <sup>4</sup>           | 96%        | 81%        | 200          | 200            |
| <b>This work</b>                           | <b>98%</b> | <b>88%</b> | <b>2500</b>  | <b>1000</b>    |

## References

1. M. Takahashi, K. Nakamura and J. Jin, *Electroanalysis*, 2008, **20**, 2205–2211.
2. S. Biswas, A. Senju, R. Mohr, T. Hodson, N. Karthikeyan, K. W. Knehr, A. G. Hsieh, X. Yang, B. E. Koel and D. A. Steingart, *Energy Environ. Sci.*, 2017, **10**, 114–120.
3. J.-H. Lee, Y. Byun, G. H. Jeong, C. Choi, J. Kwen, R. Kim, I. H. Kim, S. O. Kim and H.-T. Kim, *Adv. Mater.*, 2019, **31**, 1904524.
4. P. Xu, C. Xie, C. Wang, Q. Lai, W. Wang, H. Zhang and X. Li, *Chem. Commun.*, 2018, **54**, 11626–11629.
